# Supplementary material for: Intranasal Dexmedetomidine for Pain Management in Older Patients: A Cross-Over, Randomized, Double-Blinded, Active-Controlled Trial
Source: Springer Nature journal article supplement (doi:10.1007/s40266-023-01027-3), 2023-05-11
Supplement: MOESM1 [file 25346254]

**Online Resource 1**

**TITLE**: Intranasal dexmedetomidine for pain management in older patients: a cross-over, randomized, double blinded, active-controlled trial

**Journal:** Drugs & Aging

**Authors:** Dieudonné Rahm Nathalie, MD, Zaccaria Isabelle, Gil Wey Béatrice, Sophie Pautex, MD, PD, Walid Habre, MD, PhD, PD,Elia Nadia, MD, PhD, PD

**Corresponding author:**

Dr Nathalie Dieudonné Rahm

Hôpital de Bellerive, Chemin de la Savonnière 11, CH-1245 Collonge Bellerive, Geneva, Switzerland.

Division of palliative medicine, Department of rehabilitation and geriatrics, University Hospital of Geneva, Geneva, Switzerland

[Nathalie.Dieudonne@hcuge.ch](mailto:Nathalie.Dieudonne@hcuge.ch)

Tel +41 (0)22 305 73 05

ORCID ID: 0000-0001-5906-930X

**Online Resource 1.** ECPA, detailed observations of the patient during caregiver intervention.

|  |
| --- |
| **Observation** | |  | **SC opioid**  (n=21) | **IN dexmedetomidine** (n=21) |
|  | **Anxious anticipation of caregiver intervention** | |
| Does not show any anxiety | | n (%) | 13 (61.9%) | 11 (52.4%) |
| Looks distressed, appears to be afraid | | n (%) | 6 (28.6%) | 5 (23.8%) |
| Restless | | n (%) | 1 (4.8%) | 2 (9.5%) |
| Aggressive | | n (%) | 0 (0.0%) | 0 (0.0%) |
| Shouts, sighs, groans | | n (%) | 1 (4.8%) | 3 (14.3%) |
|  | **Reactions of the patient during caregiver intervention (during mobilization)** | |
| Lets the caregiver move him or moves himself without showing any particular attention | | n (%) | 7 (33.3%) | 8 (38.1%) |
| Has a watchful expression and seems to fear both mobilization and caregiver intervention | | n (%) | 8 (38.1%) | 6 (28.6%) |
| Holds back or guides the hands of the caregiver when being moved or during caregiver intervention | | n (%) | 3 (14.3%) | 4 (19.0%) |
| Adopts a comfortable position when being moved or during caregiver intervention | | n (%) | 3 (14.3%) | 2 (9.5%) |
| Shows resistance to mobilization or when the caregiver intervenes | | n (%) | 0 (0.0%) | 1 (4.8%) |
|  | **Reactions of the patient when**  **painful parts of the body nursed** | |
| No reaction when the caregiver intervenes | | n (%) | 3 (14.3%) | 2 (9.5%) |
| Reacts only when the caregiver intervenes | | n (%) | 7 (33.3%) | 10 (47.6%) |
| Reacts when painful parts of the body are just touched | | n (%) | 7 (33.3%) | 7 (33.3%) |
| Reacts when painful parts of the body are just lightly touched | | n (%) | 2 (9.5%) | 1 (4.8%) |
| Approaching painful areas of the body is impossible | | n (%) | 2 (9.5%) | 1 (4.8%) |
|  | **Complaints voiced by the patient during**  **caregiver intervention** | |
| Does not complain | | n (%) | 8 (38.1%) | 8 (38.1%) |
| Complains if the caregiver talks to him | | n (%) | 12 (57.1%) | 9 (42.9%) |
| Complains as soon as the caregiver is present | | n (%) | 0 (0.0%) | 2 (9.5%) |
| Moans or cries silently and spontaneously | | n (%) | 0 (0.0%) | 1 (4.8%) |
| Shouts or complains violently and spontaneously | | n (%) | 1 (4.8%) | 1 (4.8%) |
